# Supplementary material for: Interactions Between Atrial Fibrillation and Natriuretic Peptide in Predicting Heart Failure Hospitalization or Cardiovascular Death
Source: PubMed Central journal article supplement — J Am Heart Assoc. 2022 Feb 3;11(4):e022833. doi: 10.1161/JAHA.121.022833 (PMC9245805; doi:10.1161/jaha.121.022833), 2022-02-03
Supplement: JAH3-11-e022833-s001.pdf [file JAH3-11-e022833-s001.pdf]

# **Supplemental Material**

**Table S1. International Statistical Classification of Diseases-10th Revision (ICD-10) codes used to define cardiovascular death.**

| <b>Diagnosis</b>                                      | <b>Version</b> | <b>Code</b>                                                |
|-------------------------------------------------------|----------------|------------------------------------------------------------|
| Ischemic Heart Disease                                | ICD-10         | I20* I21* I22* I23* I24* I25*                              |
| Heart Failure & cardiomyopathy                        | ICD-10         | I10* I11* I12* I13* I14* I15* I16* I42* I255 J81 I50* I517 |
| Valvular heart disease                                | ICD-10         | I34* I35* I36* I37*                                        |
| Cardiac arrest (due to cardiac condition)             | ICD-10         | I462                                                       |
| Ventricular tachycardia and ventricular fibrillation  | ICD-10         | I470 I472 I4901 I4902                                      |
| Acute stroke (ischemic, non-ischemic and hemorrhagic) | ICD-10         | I60*, I161*, I63* I64* I65*, I166*, I67* I68* I69* G46*    |
| Cardiogenic shock                                     | ICD-10         | R570                                                       |
| Thromboembolism                                       | ICD-10         | I26* I82*                                                  |
| Peripheral vascular disease                           | ICD-10         | I70* I71* I72* I73* I74* I75* I76* I78* I79* I79*          |
| Infective endocarditis                                | ICD-10         | I33* I38*                                                  |

\*All digits after omitted

**Table S2. Baseline characteristics of AF and HF phenotype groups according to the composite outcome (HF hospitalization or cardiovascular death) at 2.5 years.**

| Baseline Characteristic                | Neither AF nor HF (N=488) |                      | AF only (N=354)          |                      | HF only (N=369)          |                      | AF plus HF (N=405)          |                       |
|----------------------------------------|---------------------------|----------------------|--------------------------|----------------------|--------------------------|----------------------|-----------------------------|-----------------------|
|                                        | Without Event<br>(N=452)  | With event<br>(N=36) | Without Event<br>(N=299) | With event<br>(N=55) | Without Event<br>(N=277) | With event<br>(N=92) | Without<br>Event<br>(N=277) | With event<br>(N=128) |
| <b><u>Clinical characteristics</u></b> |                           |                      |                          |                      |                          |                      |                             |                       |
| Age, median, (IQR)                     | 65 (56–73)                | 70 (65–79)           | 70 (61–78)               | 79 (69–85)           | 68 (59–76)               | 72 (57–79)           | 74 (67–81)                  | 75 (67–81)            |
| Female sex, n (%)                      | 205/452 (45)              | 17/36 (47)           | 120/299 (40)             | 30/55 (55)           | 98/277 (35)              | 30/92 ((33)          | 107/277 (39)                | 37/128 (29)           |
| Race, n (%)                            |                           |                      |                          |                      |                          |                      |                             |                       |
| Caucasian                              | 306/452 (68)              | 26/36 (72)           | 253/299 (85)             | 49/55 (89)           | 209/277 (75)             | 55/92 (59)           | 239/277 (86)                | 101/128<br>(79)       |
| Asian                                  | 92/452 (20)               | 8/36 (22)            | 29/299 (10)              | 2/55 (4)             | 44/277 (16)              | 19/92 (21)           | 18/277 (7)                  | 12/128 (9)            |

|                                          |               |               |               |               |               |               |               |               |
|------------------------------------------|---------------|---------------|---------------|---------------|---------------|---------------|---------------|---------------|
| Afro-Caribbean                           | 53/452 (12)   | 2/36 (6)      | 17/299 (6)    | 3/ 55 (5)     | 24/277 (9)    | 18/92 (20)    | 19/277 (7)    | 15/128 (12)   |
| Other                                    | 1/452 (0.2)   | -             | -             | 1/55 (2)      | -             | -             | 1/277 (0.4)   | -             |
| Heart Rhythm, n (%)                      |               |               |               |               |               |               |               |               |
| Sinus Rhythm                             | 452/452 (100) | 36/36 (100)   | -             | -             | 277/277 (100) | 92/92 (100)   | -             | -             |
| Paroxysmal AF                            | -             | -             | 178/299 (60)  | 17/55 (31)    | -             | -             | 137/277 (49)  | 47/128 (37)   |
| Persistent AF                            | -             | -             | 57/299 (19)   | 19/55 (35)    | -             | -             | 66/277 (24)   | 34/128 (27)   |
| Permanent AF                             | -             | -             | 52/299 (17)   | 17/55 (31)    | -             | -             | 59/277 (21)   | 43/128 (34)   |
| Atrial Flutter                           | -             | -             | 12/299 (4)    | 2/55 (4)      | -             | -             | 15/277 (5)    | 4/128 (3)     |
| BMI, kg/m <sup>2</sup> , median, (IQR) * | 29 (25–33)    | 29 (25–33)    | 29 (26, 33)   | 27 (23–32)    | 28 (25–32)    | 28 (24–32)    | 29 (25–33)    | 29 (26–33)    |
| Systolic BP, mmHg , median, (IQR)        | 126 (113–140) | 131 (111–145) | 130 (118–145) | 123 (109–135) | 122 (110–137) | 120 (106–130) | 121 (110–140) | 119 (106–134) |
| Heart rate/min, median, (IQR)            | 68 (61–78)    | 73 (60–89)    | 68 (58–80)    | 71 (59–88)    | 72 (63–81)    | 74 (62–83)    | 76 (63–90)    | 77 (64–89)    |

|                                     |              |            |              |            |              |            |              |             |
|-------------------------------------|--------------|------------|--------------|------------|--------------|------------|--------------|-------------|
| Ejection fraction, %, median, (IQR) | 61 (57–68)   | 60 (54–71) | 62 (57–68)   | 58 (54–68) | 47 (38–59)   | 39 (29–52) | 49 (40–58)   | 40 (27–52)  |
| Ejection fraction <50%, n (%)       | -            | -          | -            | -          | 158/267 (59) | 66/90 (73) | 141/262 (54) | 91/126 (72) |
| Previous diagnosis of stable HF     | -            | -          | -            | -          | 99/277 (36)  | 53/92 (58) | 123/277 (44) | 80/128 (63) |
| <b>Symptomatic HF</b>               |              |            |              |            |              |            |              |             |
| NYHA II HF, n (%)                   | -            | -          | -            | -          | 118/277 (43) | 25/92 (25) | 120/275 (44) | 39/126 (31) |
| NYHA III HF, n (%)                  | -            | -          | -            | -          | 52/277 (19)  | 32/92 (32) | 65/275 (24)  | 46/126 (37) |
| NYHA IV HF, n (%)                   | -            | -          | -            | -          | 11/277 (4)   | 9/92 (9)   | 16/275 (6)   | 15/126 (12) |
| LBBB, n (%)                         | 6/452 (1)    | 0/36 (0)   | 5/299 (2)    | 1/55 (2)   | 15/277 (4)   | 11/92 (12) | 12/277 (4)   | 10/128 (8)  |
| <b>Medical history, n (%)</b>       |              |            |              |            |              |            |              |             |
| Diabetes                            | 195/452 (43) | 17/36 (47) | 59/299 (20)  | 16/55 (29) | 113/277 (41) | 53/92 (58) | 66/277 (24)  | 46/128 (36) |
| Hypertension                        | 299/452 (66) | 23/36 (64) | 167/299 (56) | 38/55 (69) | 166/277 (60) | 54/92 (59) | 130/277 (47) | 69/128 (54) |
| Coronary artery disease             | 206/452 (46) | 18/36 (50) | 50/299 (17)  | 8/55 (15)  | 155/277 (56) | 48/92 (52) | 88/277 (32)  | 56/128 (44) |

|                                                              |              |                    |                    |                      |                    |                     |                     |                         |
|--------------------------------------------------------------|--------------|--------------------|--------------------|----------------------|--------------------|---------------------|---------------------|-------------------------|
| Hyponatremia (Na <135 mmol/L)*                               | 71/445 (16)  | 6/36 (17)          | 30/272 (11)        | 13/55 (24)           | 46/274 (17)        | 25/92 (27)          | 28/270 (11)         | 29/127 (23)             |
| Severe valvular heart disease                                | 9/452 (2)    | 0/36 (0)           | 8/299 (3)          | 9/55 (16)            | 7/277 (3)          | 5/92 (5)            | 21/277 (8)          | 20/128 (16)             |
| HF hospitalization at presentation                           | -            | -                  | -                  | -                    | 15/277 (5)         | 8/92 (9)            | 4/277 (1)           | 12/128 (9)              |
| <b>Laboratory measurements</b>                               |              |                    |                    |                      |                    |                     |                     |                         |
| eGFR mL/min/1.73m <sup>2</sup> , (CKD-EPI),<br>median, (IQR) | 81 (64–95)   | 66 (43–86)         | 75 (62–88)         | 56 (42–75)           | 75 (57–91)         | 59 (44–77)          | 66 (47–82)          | 56 (40–78)              |
| NT-proBNP pg/mL, median,<br>(IQR)                            | 192 (68–558) | 968 (250–<br>2478) | 485 (167–<br>1191) | 2580 (1204–<br>6465) | 659 (218–<br>2067) | 1801 (522–<br>4752) | 1279 (461–<br>3330) | 2793<br>(1220–<br>6314) |
| NT-proBNP ≥125pg/ml, n (%)                                   | 266/452 (59) | 32/36 (89)         | 240/299 (80)       | 55/55 (100)          | 225/277 (81)       | 87/92 (95)          | 256/277 (92)        | 126/128<br>(98)         |
| NT-proBNP groups, n (%)                                      |              |                    |                    |                      |                    |                     |                     |                         |
| <300pg/mL                                                    | 276/452 (61) | 10/36 (28)         | 119/299 (40)       | 2/55 (4)             | 88/277 (32)        | 11/91 (12)          | 50/277 (18)         | 6/128 (5)               |

|                                 |               |                |               |               |               |                |               |                |
|---------------------------------|---------------|----------------|---------------|---------------|---------------|----------------|---------------|----------------|
| 300–999pg/mL                    | 99/452 (22)   | 8/36 (22)      | 91/299 (30)   | 10/55 (18)    | 78//277 (28)  | 21/91 (23)     | 71/277 (26)   | 16/128 (13)    |
| 1000–1999pg/mL                  | 38/452 (8)    | 6/36 (17)      | 48/299 (16)   | 10/55 (18)    | 40//277 (14)  | 16/91 (18)     | 51/277 (18)   | 28/128 (22)    |
| ≥2000pg/mL                      | 39/452 (9)    | 12/36 (33)     | 41/299 (14)   | 33/55 (60)    | 71//277 (26)  | 43/91 (47)     | 105/277 (38)  | 78/128 (61)    |
| Sodium mmol/L, median, (IQR) *  | 138 (136–140) | 138 (136–140)  | 139 (137–141) | 139 (135–141) | 138 (136–140) | 137 (134–140)  | 139 (137–141) | 138 (135–140)  |
| Urea mmol/L, median, (IQR) *    | 5.5 (4.4–7.0) | 6.4 (5.0–10.3) | 5.6 (4.6–6.9) | 6.9 (5.8–9.1) | 5.8 (4.5–7.2) | 7.8 (5.7–11.8) | 6.3 (4.9–8.8) | 9.2 (6.1–13.1) |
| Hemoglobin g/L, median, (IQR) * | 134 (121–145) | 119 (109–134)  | 137 (124–148) | 124 (105–137) | 131 (118–144) | 122 (105–139)  | 130 (116–142) | 121 (110–136)  |
| <b>Pharmacotherapy, n (%)</b>   |               |                |               |               |               |                |               |                |
| Beta-blocker                    | 247/452 (55)  | 18/36 (50)     | 153/299 (51)  | 29/55 (53)    | 173 /277 (63) | 59/92 (64)     | 161/277 (58)  | 68/128 (53)    |
| ACE-inhibitors or ARB           | 223/452 (49)  | 18/36 (50)     | 137/299 (46)  | 24/55 (44)    | 164/277 (59)  | 51/92 (55)     | 138/277 (50)  | 61/128 (48)    |
| NOAC                            | 9/452 (2)     | 0/36 (0)       | 133/299 (44)  | 25/55 (45)    | 6/277 (2)     | 3/92 (3)       | 133/277 (48)  | 57/128 (45)    |

|                             |             |            |             |            |             |            |              |             |
|-----------------------------|-------------|------------|-------------|------------|-------------|------------|--------------|-------------|
| Warfarin                    | 4/452 (1)   | 1/36 (3)   | 65/299 (22) | 13/55 (24) | 8/277 (3)   | 5/92 (5)   | 72/277 (26)  | 38/128 (30) |
| Diuretic                    | 83/452 (18) | 14/36 (39) | 59/299 (20) | 24/55 (44) | 97/277 (35) | 30/92 (33) | 135/277 (49) | 41/128 (32) |
| MRA                         | 6/452 (1)   | 0/36 (0)   | 5/299 (2)   | 4/55 (7)   | 23/277 (7)  | 22/92 (24) | 20/277 (7)   | 24/128 (19) |
| Complex device (ICD or CRT) | 4/452 (1)   | 1/36 (3)   | 2/299 (1)   | 3/55 (5)   | 14/277 (5)  | 12/92 (13) | 20/277 (7)   | 18/128 (14) |

---

ACE, Angiotensin converting enzyme; AF, atrial fibrillation; ARB, angiotensin receptor blocker; BMI, body mass index; BP, blood pressure; CKD-EPI, Chronic Kidney Disease Epidemiology Collaboration; CRT, cardiac resynchronization therapy; eGFR, estimate glomerular filtration rate; ICD, implantable cardioverter defibrillator; IQR, interquartile range; LBBB, left bundle branch block; MRA, mineralocorticoid receptor antagonist; Na, sodium; NOAC, Novel oral anticoagulant; NT-proBNP, N-terminal pro-B-type natriuretic peptide; VKA, vitamin K antagonist.

\* Baseline data were missing in 3.6% of the study population for BMI, 2.4% for hemoglobin, 2.8% for urea and sodium.



**Table S3. Outcomes stratified according to AF and HF phenotype groups.**

| <b>Patient Group</b>     | <b>Composite outcome</b>                        | <b>HF Hospitalization</b>                       | <b>Cardiovascular Death</b>                     | <b>All-Cause Mortality</b>                      |
|--------------------------|-------------------------------------------------|-------------------------------------------------|-------------------------------------------------|-------------------------------------------------|
|                          | Events/person-yrs<br>(incidence/100 person-yrs) | Events/person-yrs<br>(incidence/100 person-yrs) | Events/person-yrs<br>(incidence/100 person-yrs) | Events/person-yrs<br>(incidence/100 person-yrs) |
| <b>Entire Cohort</b>     | 310/3381 (9.2)                                  | 202/3686 (5.5)                                  | 168/3657 (4.6)                                  | 254/3657 (7.0)                                  |
| <b>Neither AF nor HF</b> | 36/1135 (3.2)                                   | 18/1190 (1.5)                                   | 22/1160 (1.9)                                   | 40/1159 (3.4)                                   |
| <b>AF only</b>           | 55/775 (7.1)                                    | 34/826 (4.1)                                    | 32/819 (3.9)                                    | 47/819 (5.7)                                    |
| <b>HF only</b>           | 91/759 (12.1)                                   | 59/824 (7.2)                                    | 52/828 (6.3)                                    | 66/828 (8.0)                                    |
| <b>AF plus HF</b>        | 128/722 (17.7)                                  | 91/846 (10.8)                                   | 62/850 (7.3)                                    | 101/850 (11.9)                                  |

**Table S4. C-Statistic of NT-proBNP as a continuous variable in each patient group for the composite outcome, its individual components i.e., HF hospitalization and cardiovascular death, and all-cause mortality.**

| Patient Group            | Composite Outcome    | <i>P</i> Value | HF Hospitalization   | <i>P</i> Value | Cardiovascular       | <i>P</i> Value | All-Cause Mortality  | <i>P</i> Value |
|--------------------------|----------------------|----------------|----------------------|----------------|----------------------|----------------|----------------------|----------------|
|                          | C-Statistic (95% CI) |                | C-Statistic (95% CI) |                | Death                |                | C-Statistic (95% CI) |                |
|                          |                      |                |                      |                | C-Statistic (95% CI) |                |                      |                |
| <b>Entire Cohort</b>     | 0.74 (0.72 to 0.77)  | <0.001         | 0.72 (0.69 to 0.75)  | <0.001         | 0.76 (0.73 to 0.80)  | <0.001         | 0.72 (0.69 to 0.75)  | <0.001         |
| <b>Neither AF nor HF</b> | 0.73 (0.65 to 0.81)  | <0.001         | 0.74 (0.64 to 0.84)  | <0.001         | 0.74 (0.63 to 0.85)  | <0.001         | 0.67 (0.59 to 0.76)  | <0.001         |
| <b>AF only</b>           | 0.82 (0.77 to 0.87)  | <0.001         | 0.79 (0.72 to 0.85)  | <0.001         | 0.86 (0.80 to 0.91)  | <0.001         | 0.79 (0.73 to 0.85)  | <0.001         |
| <b>HF only</b>           | 0.66 (0.60 to 0.72)  | <0.001         | 0.64 (0.57 to 0.71)  | <0.001         | 0.71 (0.64 to 0.78)  | <0.001         | 0.70 (0.63 to 0.77)  | <0.001         |
| <b>AF plus HF</b>        | 0.66 (0.61 to 0.70)  | <0.001         | 0.61 (0.55 to 0.66)  | <0.001         | 0.68 (0.62 to 0.75)  | <0.001         | 0.65 (0.59 to 0.71)  | <0.001         |

**Table S5. Optimal cut-point in the entire cohort and each patient group (Youden index) and important cut-offs with associated area under the ROC curve, sensitivity, specificity, positive predictive value and negative predictive value of NT-proBNP for the composite outcome (heart failure hospitalization or cardiovascular death).**

| NT-proBNP cut-off         | Patient Group     | AUC (95% CI)        | Sensitivity (95% CI) | Specificity (95% CI) | Positive predictive value (95% CI) | Negative predictive value (95% CI) |
|---------------------------|-------------------|---------------------|----------------------|----------------------|------------------------------------|------------------------------------|
| <b>Optimal cut-point</b>  |                   |                     |                      |                      |                                    |                                    |
| <b>(Youden index)</b>     |                   |                     |                      |                      |                                    |                                    |
| 1079pg/ml                 | Entire Cohort     | 0.70 (0.68 to 0.73) | 71% (66% to 76%)     | 69% (67% to 72%)     | 36% (32% to 39%)                   | 91% (89% to 93%)                   |
| 229pg/ml                  | Neither AF nor HF | 0.68 (0.61 to 0.75) | 81% (64% to 92%)     | 55% (51% to 60%)     | 13% (9% to 18%)                    | 97% (95% to 99%)                   |
| 1182pg/ml                 | AF only           | 0.77 (0.71 to 0.83) | 78% (65% to 88%)     | 75% (70% to 80%)     | 36% (28% to 46%)                   | 95% (91% to 97%)                   |
| 1407pg/ml                 | HF only           | 0.64 (0.58 to 0.70) | 60% (49% to 70%)     | 68% (62% to 74%)     | 39% (31% to 47%)                   | 84% (78% to 88%)                   |
| 2128pg/ml                 | AF plus HF        | 0.62 (0.57 to 0.67) | 60% (51% to 69%)     | 64% (58% to 69%)     | 43% (36% to 51%)                   | 78% (72% to 83%)                   |
| <b>Important cut-offs</b> |                   |                     |                      |                      |                                    |                                    |

|           |                   |                     |                    |                  |                  |                    |
|-----------|-------------------|---------------------|--------------------|------------------|------------------|--------------------|
| 125pg/ml  | Entire Cohort     | 0.60 (0.59 to 0.62) | 97% (94% to 98%)   | 24% (22% to 27%) | 23% (21% to 26%) | 97% (94% to 98%)   |
|           | Neither AF nor HF | 0.65 (0.59 to 0.71) | 89% (74% to 97%)   | 41% (37% to 46%) | 11% (7% to 15%)  | 98% (95% to 99%)   |
|           | AF only           | 0.60 (0.58 to 0.62) | 100% (94 to 100%)  | 20% (15% to 25%) | 19% (14% to 24%) | 100% (94% to 100%) |
|           | HF only           | 0.57 (0.53 to 0.60) | 95% (88 to 98%)    | 19% (14% to 24%) | 28% (23% to 33%) | 91% (81% to 97%)   |
|           | AF plus HF        | 0.53 (0.51 to 0.55) | 98% (95% to 100%)  | 8% (5% to 11%)   | 33% (28% to 38%) | 91% (72% to 99%)   |
| 300pg/ml  | Entire Cohort     | 0.66 (0.64 to 0.68) | 90% (0.87 to 0.93) | 41% (38% to 44%) | 27% (24% to 30%) | 95% (93% to 96%)   |
|           | Neither AF nor HF | 0.67 (0.59 to 0.74) | 72% (55% to 86%)   | 61% (56% to 66%) | 13% (9% to 18%)  | 97% (94% to 98%)   |
|           | AF only           | 0.68 (0.64 to 0.72) | 96% (88% to 100%)  | 40% (34% to 46%) | 23% (18% to 29%) | 98% (94% to 100%)  |
|           | HF only           | 0.59 (55 to 0.64)   | 87% (78% to 93%)   | 32% (26% to 38%) | 30% (24% to 36%) | 88% (80% to 94%)   |
|           | AF plus HF        | 0.57 (0.54 to 0.60) | 95% (90% to 98%)   | 18% (14% to 23%) | 35% (30% to 40%) | 89% (78% to 96%)   |
| 1000pg/ml | Entire Cohort     | 0.70 (0.67 to 0.73) | 73% (67% to 78%)   | 67% (64% to 69%) | 34% (31% to 38%) | 91% (89% to 93%)   |
|           | Neither AF nor HF | 0.67 (0.58 to 0.75) | 50% (33% to 67%)   | 83% (79% to 86%) | 19% (12% to 28%) | 95% (93% to 97%)   |

|           |                   |                      |                  |                  |                  |                  |
|-----------|-------------------|----------------------|------------------|------------------|------------------|------------------|
|           | AF only           | 0.74 (0.68 to 0.80)  | 78% (65% to 88%) | 70% (65% to 75%) | 33% (25% to 41%) | 95% (91% to 97%) |
|           | HF only           | 0.62 (0.56 to 0.68)  | 64% (54% to 74%) | 60% (54% to 66%) | 35% (28% to 42%) | 83% (78% to 88%) |
|           | AF plus HF        | 0.63 (0.59 to 0.68)  | 83% (75% to 89%) | 44% (38% to 50%) | 41% (35% to 47%) | 85% (78% to 90%) |
| 2000pg/ml | Entire Cohort     | 0.67 (0.64 to 0.70)) | 53% (48% to 59%) | 80% (78% to 83%) | 39% (35% to 44%) | 88% (86% to 90%) |
|           | Neither AF nor HF | 0.62 (0.54 to 0.70)  | 33% (19% to 51%) | 91% (88% to 94%) | 24% (13% to 38%) | 95% (92% to 96%) |
|           | AF only           | 0.73 (0.66 to 0.80)  | 60% (46% to 73%) | 86% (82% to 90%) | 45% (33% to 57%) | 92% (88% to 95%) |
|           | HF only           | 0.61 (0.55 to 0.66)  | 47% (36% to 57%) | 74% (69% to 79%) | 38% (29% to 47%) | 81% (75% to 85%) |
|           | AF plus HF        | 0.62 (0.56 to 0.67)  | 61% (52% to 69%) | 62% (56% to 68%) | 43% (35% to 50%) | 78% (71% to 83%) |

---

**Table S6. Performance of important cut-offs at predicting the composite outcome evaluated using discrimination, calibration, and reclassification. An NT-proBNP cut-off of 300pg/ml was used as a reference for NRI with two risk levels were selected: >20% and <20% risk of the composite outcome.**

| NT-proBNP<br>Cut-off |                   | Discrimination      | Calibration         |      |      | Reclassification |           |                      |
|----------------------|-------------------|---------------------|---------------------|------|------|------------------|-----------|----------------------|
|                      |                   | C-Statistic         | Brier Score         | AIC  | BIC  | Likelihood Ratio | NRI (20%) | IDI                  |
| <b>125pg/ml</b>      | Entire Cohort     | 0.60 (0.58 to 0.61) | 0.12 (0.10 to 0.13) | 4425 | 4430 | $p=0.013$        | No change | 0.001 ( $p=0.040$ )  |
|                      | Neither AF nor HF | 0.65 (0.60 to 0.70) | 0.06 (0.04 to 0.08) | 428  | 432  | $p=0.076$        | No change | 0.003 ( $p=0.120$ )  |
|                      | AF only           | 0.59 (0.57 to 0.61) | 0.11 (0.08 to 0.14) | 615  | 619  | $p=0.101$        | No change | -0.003 ( $p<0.001$ ) |
|                      | HF only           | 0.56 (0.53 to 0.59) | 0.13 (0.11 to 0.16) | 1050 | 1054 | $p=0.270$        | No change | 0.002 ( $p=0.298$ )  |
|                      | AF plus HF        | 0.53 (0.51 to 0.54) | 0.14 (0.12 to 0.16) | 1472 | 1476 | $p=0.679$        | No change | 0.0001 ( $p=0.734$ ) |
| <b>300pg/ml</b>      | Entire Cohort     | 0.65 (0.63 to 0.66) | 0.11 (0.99 to 0.12) | 4364 | 4370 | Reference        | Reference | Reference            |
|                      | Neither AF nor HF | 0.66 (0.59 to 0.74) | 0.06 (0.41 to 0.08) | 428  | 432  | Reference        | Reference | Reference            |
|                      | AF only           | 0.67 (0.64 to 0.70) | 0.90 (0.72 to 0.12) | 601  | 605  | Reference        | Reference | Reference            |

|                  |                   |                     |                     |      |      |           |                    |                    |
|------------------|-------------------|---------------------|---------------------|------|------|-----------|--------------------|--------------------|
|                  | HF only           | 0.59 (0.55 to 0.62) | 0.13 (0.11 to 0.16) | 1047 | 1051 | Reference | Reference          | Reference          |
|                  | AF plus HF        | 0.56 (0.54 to 0.58) | 0.14 (0.12 to 0.16) | 1463 | 1467 | Reference | Reference          | Reference          |
| <b>1000pg/ml</b> | Entire Cohort     | 0.69 (0.66 to 0.71) | 0.10 (0.09 to 0.12) | 4345 | 4350 | $P<0.001$ | 0.08 ( $p=0.003$ ) | 0.04 ( $p<0.001$ ) |
|                  | Neither AF nor HF | 0.66 (0.58 to 0.74) | 0.06 (0.04 to 0.08) | 425  | 429  | $P=0.017$ | No change          | 0.02 ( $p=0.013$ ) |
|                  | AF only           | 0.73 (0.68 to 0.78) | 0.09 (0.06 to 0.11) | 590  | 594  | $P<0.001$ | 0.12 ( $p=0.062$ ) | 0.06 ( $p<0.001$ ) |
|                  | HF only           | 0.62 (0.57 to 0.67) | 0.13 (0.11 to 0.15) | 1043 | 1047 | $P=0.008$ | No change          | 0.02 ( $p=0.014$ ) |
|                  | AF plus HF        | 0.62 (0.59 to 0.65) | 0.13 (0.11 to 0.15) | 1448 | 1452 | $P<0.001$ | 0.13 ( $p=0.002$ ) | 0.04 ( $p<0.001$ ) |
| <b>2000pg/ml</b> | Entire Cohort     | 0.66 (0.63 to 0.69) | 0.11 (0.10 to 0.12) | 4372 | 4377 | $P<0.001$ | 0.03 ( $p=0.507$ ) | 0.05 ( $p<0.001$ ) |
|                  | Neither AF nor HF | 0.62 (0.54 to 0.70) | 0.06 (0.04 to 0.08) | 428  | 432  | $P=0.014$ | No change          | 0.02 ( $p=0.028$ ) |
|                  | AF only           | 0.72 (0.66 to 0.78) | 0.08 (0.06 to 0.10) | 586  | 590  | $P<0.001$ | 0.10 ( $p=0.263$ ) | 0.11 ( $p<0.001$ ) |
|                  | HF only           | 0.60 (0.55 to 0.65) | 0.13 (0.11 to 0.16) | 1046 | 1050 | $P=0.008$ | No Change          | 0.02 ( $p=0.016$ ) |
|                  | AF plus HF        | 0.61 (0.56 to 0.65) | 0.14 (0.11 to 0.16) | 1458 | 1462 | $P<0.001$ | No Change          | 0.03 ( $p=0.001$ ) |

---

**Table S7. Univariate Cox proportional hazards models based on cut-offs with B coefficient and baseline hazard in the entire cohort.**

| <b>NT-proBNP cut-off</b> | <b>B coefficient</b> | <b>95% Confidence Interval</b> | <b>Standard Error</b> | <b>Z score</b> | <b>p value</b> | <b>Baseline Hazard</b> |
|--------------------------|----------------------|--------------------------------|-----------------------|----------------|----------------|------------------------|
| 125pg/ml                 | 2.08                 | 1.48 to 2.69                   | 0.31                  | 6.79           | <0.001         | 0.03                   |
| 300pg/ml                 | 1.78                 | 1.39 to 2.15                   | 0.19                  | 9.20           | <0.001         | 0.05                   |
| 1000pg/ml                | 1.55                 | 1.30 to 1.80                   | 0.13                  | 12.17          | <0.001         | 0.08                   |
| 2000pg/ml                | 1.40                 | 1.18 to 1.63                   | 0.11                  | 12.32          | <0.001         | 0.11                   |



**Transparent reporting of a multivariable prediction model for individual prognosis or diagnosis (TRIPOD): The TRIPOD Checklist for Prediction Model Development** (Collins GS, Reitsma JB, Altman DG, Moons KG. Transparent reporting of a multivariable prediction model for individual prognosis or diagnosis (TRIPOD): The TRIPOD statement).

| Section/Topic                |     | Checklist Item |                                                                                                                                                                                                  | Page            |
|------------------------------|-----|----------------|--------------------------------------------------------------------------------------------------------------------------------------------------------------------------------------------------|-----------------|
| <b>Title and abstract</b>    |     |                |                                                                                                                                                                                                  |                 |
| Title                        | 1   | D;V            | Identify the study as developing and/or validating a multivariable prediction model, the target population, and the outcome to be predicted.                                                     | 1               |
| Abstract                     | 2   | D;V            | Provide a summary of objectives, study design, setting, participants, sample size, predictors, outcome, statistical analysis, results, and conclusions.                                          | 3-4             |
| <b>Introduction</b>          |     |                |                                                                                                                                                                                                  |                 |
| Background and objectives    | 3a  | D;V            | Explain the medical context (including whether diagnostic or prognostic) and rationale for developing or validating the multivariable prediction model, including references to existing models. | 6-7             |
|                              | 3b  | D;V            | Specify the objectives, including whether the study describes the development or validation of the model or both.                                                                                | 6-7             |
| <b>Methods</b>               |     |                |                                                                                                                                                                                                  |                 |
| Source of data               | 4a  | D;V            | Describe the study design or source of data (e.g., randomized trial, cohort, or registry data), separately for the development and validation data sets, if applicable.                          | 7-8             |
|                              | 4b  | D;V            | Specify the key study dates, including start of accrual; end of accrual; and, if applicable, end of follow-up.                                                                                   | 7-8<br>Figure 1 |
| Participants                 | 5a  | D;V            | Specify key elements of the study setting (e.g., primary care, secondary care, general population) including number and location of centers.                                                     | 7-8             |
|                              | 5b  | D;V            | Describe eligibility criteria for participants.                                                                                                                                                  | 7-8             |
|                              | 5c  | D;V            | Give details of treatments received, if relevant.                                                                                                                                                | n/a             |
| Outcome                      | 6a  | D;V            | Clearly define the outcome that is predicted by the prediction model, including how and when assessed.                                                                                           | 9-10            |
|                              | 6b  | D;V            | Report any actions to blind assessment of the outcome to be predicted.                                                                                                                           | n/a             |
| Predictors                   | 7a  | D;V            | Clearly define all predictors used in developing the multivariable prediction model, including how and when they were measured.                                                                  | 11-13           |
|                              | 7b  | D;V            | Report any actions to blind assessment of predictors for the outcome and other predictors.                                                                                                       | n/a             |
| Sample size                  | 8   | D;V            | Explain how the study size was arrived at.                                                                                                                                                       | 7-8             |
| Missing data                 | 9   | D;V            | Describe how missing data were handled (e.g., complete-case analysis, single imputation, multiple imputation) with details of any imputation method.                                             | 11-13           |
| Statistical analysis methods | 10a | D              | Describe how predictors were handled in the analyses.                                                                                                                                            | 11-13           |
|                              | 10b | D              | Specify type of model, all model-building procedures (including any predictor selection), and method for internal validation.                                                                    | 11-13           |
|                              | 10c | V              | For validation, describe how the predictions were calculated.                                                                                                                                    | n/a             |

|                            |     |     |                                                                                                                                                                                                       |                                                                         |
|----------------------------|-----|-----|-------------------------------------------------------------------------------------------------------------------------------------------------------------------------------------------------------|-------------------------------------------------------------------------|
|                            | 10d | D;V | Specify all measures used to assess model performance and, if relevant, to compare multiple models.                                                                                                   | 11-13                                                                   |
|                            | 10e | V   | Describe any model updating (e.g., recalibration) arising from the validation, if done.                                                                                                               | n/a                                                                     |
| Risk groups                | 11  | D;V | Provide details on how risk groups were created, if done.                                                                                                                                             | 11                                                                      |
| Development vs. validation | 12  | V   | For validation, identify any differences from the development data in setting, eligibility criteria, outcome, and predictors.                                                                         | n/a                                                                     |
| <b>Results</b>             |     |     |                                                                                                                                                                                                       |                                                                         |
| Participants               | 13a | D;V | Describe the flow of participants through the study, including the number of participants with and without the outcome and, if applicable, a summary of the follow-up time. A diagram may be helpful. | Figure 1                                                                |
|                            | 13b | D;V | Describe the characteristics of the participants (basic demographics, clinical features, available predictors), including the number of participants with missing data for predictors and outcome.    | Table 1                                                                 |
|                            | 13c | V   | For validation, show a comparison with the development data of the distribution of important variables (demographics, predictors and outcome).                                                        | n/a                                                                     |
| Model development          | 14a | D   | Specify the number of participants and outcome events in each analysis.                                                                                                                               | 14<br>Figure 1                                                          |
|                            | 14b | D   | If done, report the unadjusted association between each candidate predictor and outcome.                                                                                                              | Table 2                                                                 |
| Model specification        | 15a | D   | Present the full prediction model to allow predictions for individuals (i.e., all regression coefficients, and model intercept or baseline survival at a given time point).                           | Table 2<br>Supplemental Materials<br>Table 7                            |
|                            | 15b | D   | Explain how to use the prediction model.                                                                                                                                                              | 15-18                                                                   |
| Model performance          | 16  | D;V | Report performance measures (with CIs) for the prediction model.                                                                                                                                      | Supplemental Materials<br>Table 5,<br>Supplemental Materials<br>Table 6 |
| Model-updating             | 17  | V   | If done, report the results from any model updating (i.e., model specification, model performance).                                                                                                   | n/a                                                                     |
| <b>Discussion</b>          |     |     |                                                                                                                                                                                                       |                                                                         |
| Limitations                | 18  | D;V | Discuss any limitations of the study (such as nonrepresentative sample, few events per predictor, missing data).                                                                                      | 22                                                                      |
| Interpretation             | 19a | V   | For validation, discuss the results with reference to performance in the development data, and any other validation data.                                                                             | n/a                                                                     |
|                            | 19b | D;V | Give an overall interpretation of the results, considering objectives, limitations, results from similar studies, and other relevant evidence.                                                        | 18                                                                      |
| Implications               | 20  | D;V | Discuss the potential clinical use of the model and implications for future research.                                                                                                                 | 20-21                                                                   |
| <b>Other information</b>   |     |     |                                                                                                                                                                                                       |                                                                         |
| Supplementary information  | 21  | D;V | Provide information about the availability of supplementary resources, such as study protocol, Web calculator, and data sets.                                                                         | n/a                                                                     |
| Funding                    | 22  | D;V | Give the source of funding and the role of the funders for the present study.                                                                                                                         | 23                                                                      |
